# Supplementary material for: Long non-coding RNA PXN-AS1 suppresses pancreatic cancer progression by acting as a competing endogenous RNA of miR-3064 to upregulate PIP4K2B expression
Source: PubMed Central journal article supplement (PMC6727519; doi:10.1186/s13046-019-1379-5), 2019-09-05

Figure S1

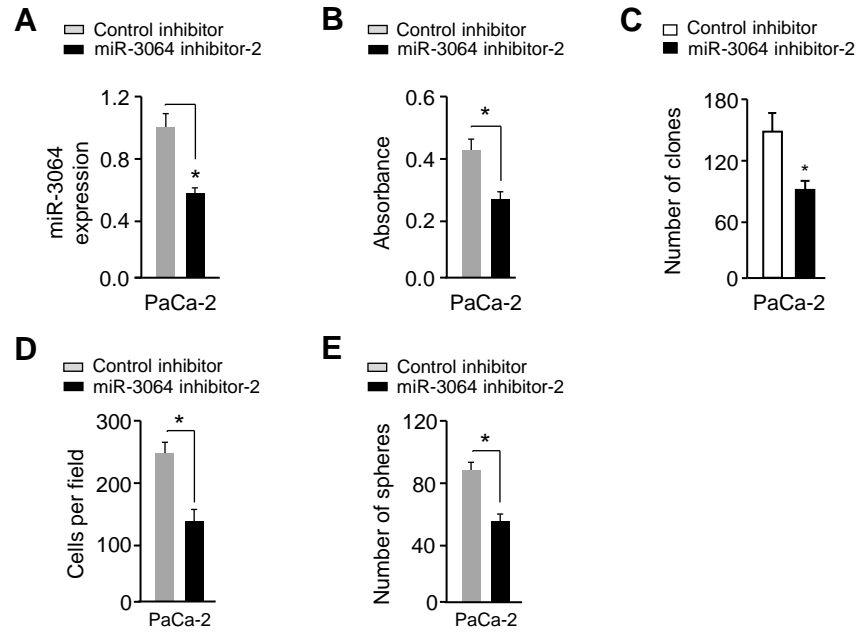

Supplement: 13046_2019_1379_MOESM1_ESM.pdf [file 13046_2019_1379_MOESM1_ESM.pdf]
